# Supplementary material
Source: publisher figshare collection journal article supplement (https://tandf.figshare.com/articles/dataset/_/9119459)
Supplement: Supplementary file 1 [file 1]

### Supplementary Table I.

List of antibodies used in the study.

| Primary antibodies                    | Source                     | Clone      | Catalogue number |
|---------------------------------------|----------------------------|------------|------------------|
| Phospho-CBK1 (Ser317)                 | Cell Signaling Technology  | D12H3      | #12302           |
| Phospho-AKT (Ser473)                  | Cell Signaling Technology  | Polyclonal | #9271            |
| Phospho-mTOR (Ser2448)                | Cell Signaling Technology  | D9C2       | #5536            |
| NF- $\kappa$ B p65                    | Cell Signaling Technology  | D14E12     | #8242            |
| Phospho-STAT5 (Tyr694)                | Cell Signaling Technology  | Polyclonal | #9351            |
| FOXO1                                 | Cell Signaling Technology  | C29H4      | #2280            |
| FOXO3A                                | Cell Signaling Technology  | 75D8       | #2947            |
| PUMA                                  | Cell Signaling Technology  | D30C10     | #12450           |
| Lamin A/C                             | Cell Signaling Technology  | 4C11       | #4777            |
| Nedd8                                 | Cell Signaling Technology  | 19E3       | #2754            |
| STAT5                                 | Santa Cruz Biotechnology   | Polyclonal | sc-836           |
| I $\kappa$ B $\alpha$                 | Santa Cruz Biotechnology   | Polyclonal | sc-371           |
| Phospho-I $\kappa$ B $\alpha$ (Ser32) | Santa Cruz Biotechnology   | B-9        | sc-8404          |
| C-MYC                                 | Epitomics, Sigma Aldrich   | EP121      | AC-0116          |
| MCL1                                  | Abcam                      | Y37        | ab32087          |
| NOXA                                  | Imgenex, Novus Biologicals | 114C307    | NB600-1159       |
| P27                                   | Santa Cruz Biotechnology   | C-19       | sc-528           |
| CDT1                                  | Cell Signaling Technology  | D10F11     | #8064            |
| $\gamma$ H2AX (Ser139)                | EMD Millipore              | JBW301     | 05-636           |
| $\beta$ -actin                        | EMD Millipore              | C4         | MAB1501          |
| Beta-catenin                          | BD biosciences             | 14         | 610154           |

## Supplementary Table II.

TP53 status cell lines used in this study.

| Cell line name | P53 status                    | Reference/source                                |
|----------------|-------------------------------|-------------------------------------------------|
| SD1            | Wildtype                      | Dhut <i>et al.</i> PMID: 1847983                |
| SUPB15         | Wildtype                      | Zhou <i>et al.</i> PMID: 7888679                |
| BV173          | Wildtype                      | Pegoraro <i>et al.</i> PMID: 6572735            |
| KBM5           | Mutant (c. 818G>A)            | Sen <i>et al.</i> PMID: 7627932                 |
| MOLM-6         | Wildtype                      | Drexler <i>et al.</i> PMID: 10637496            |
| KCL-22         | Mutant (frameshift)           | Kubonishi & Miyoshi PMID: 6321612               |
| P30-OHKUBO     | Wildtype                      | Hirose <i>et al.</i> PMID: 6983990              |
| NALM-1         | Wildtype                      | Sonta <i>et al.</i> PMID: 302341                |
| K562           | Mutant (407 insC p.Q136fsX13) | Law <i>et al.</i> PMID: 8246608                 |
| NCI-H929       | Wildtype                      | Gazdar <i>et al.</i> PMID: 2423157              |
| ANBL-6         | Mutant (Q331stop)             | Moreaux <i>et al.</i> PMID: 21173094            |
| XG-1           | Mutant (Y126N)                | Moreaux <i>et al.</i> PMID: 21173094            |
| UM-3           | Wildtype                      | Boersma-Vreugdenhil <i>et al.</i> PMID:15257707 |
