# Supplementary material
Source: publisher figshare collection journal article supplement (https://tandf.figshare.com/articles/dataset/_/9119459)
Supplement: Supplementary file 2 [file 1]

# Figure S1

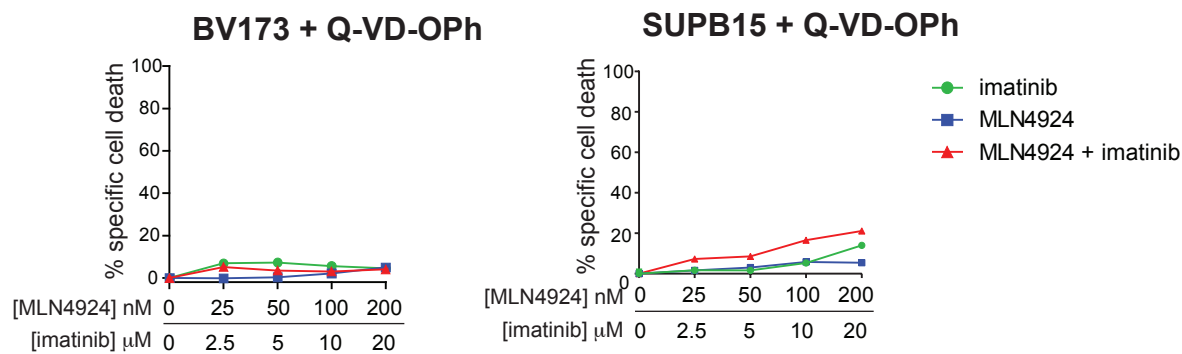

**Figure S1. MLN4924 and imatinib induce caspase-dependent cell death in BV173 and SUPB15 cells.** BV173 and SUPB15 were exposed for 3 days to various concentrations of MLN4924 and imatinib, with the pan-caspase inhibitor Q-VD-OPh. Three independent experiments were performed, cultures were done in triplicate. Means  $\pm$  SEM of percent specific cell death are depicted in the graphs.

Figure S2

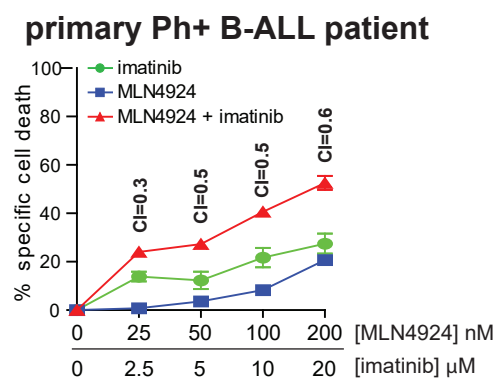

**Figure S2. MLN4924 synergizes with imatinib for the induction of cell death in primary Ph+ leukemia cells.** Primary CD34+ leukemic blasts from a previously untreated adult Ph+ B-ALL patient were cultured overnight with IL3, IL6, IL7 and SCF, and subsequently treated for 3 days with various concentrations of MLN4924 and imatinib in the presence of these cytokines. Cultures were performed in triplicate (technical replicates), means  $\pm$  SEM are shown.

Figure S3

A

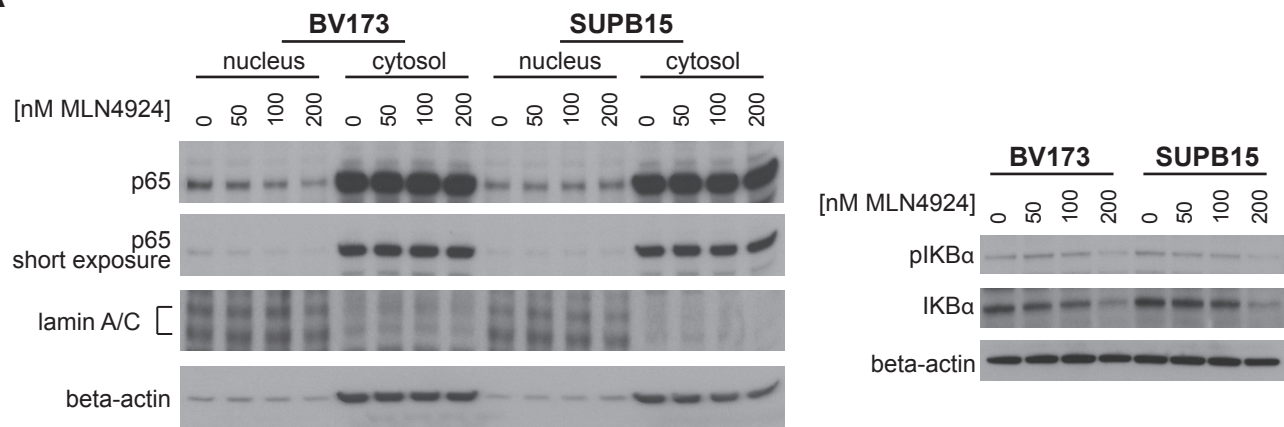

B

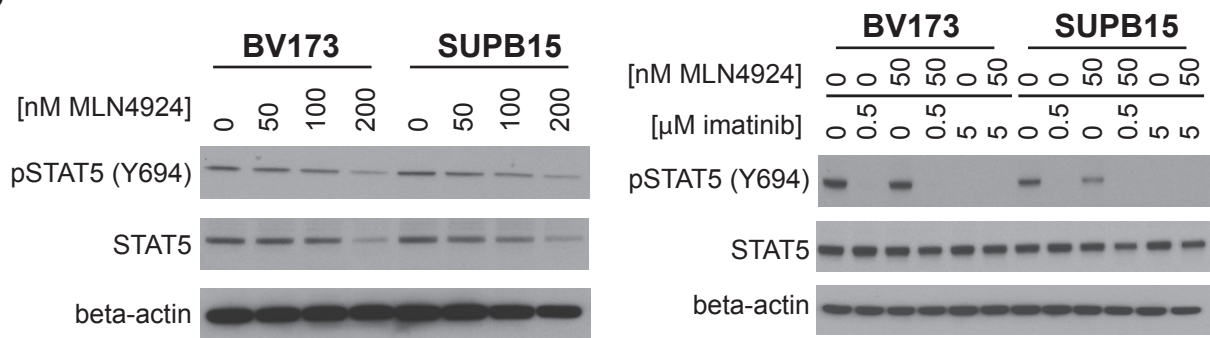

C

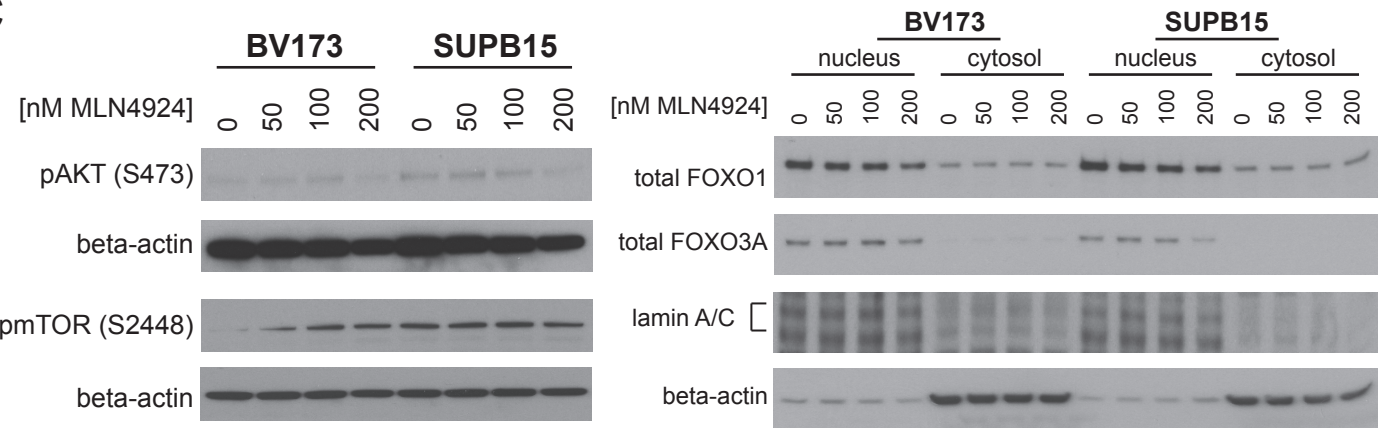

**Figure S3. MLN4924 treatment has no appreciable effect on NF-κB, STAT5, and AKT signaling in BV173 and SUPB15 cells.** (A) Immunoblotting analysis of nuclear and cytosolic NF-κB p65 protein levels (right panels) and phospho-IκBα and total IκBα levels in whole cell extracts (right panels), in BV173 and SUPB15 cells exposed overnight to various concentrations of MLN4924, as indicated. (B) Immunoblotting analysis of phospho-STAT5 and total STAT5 levels in BV173 and SUPB15 cells treated overnight with MLN4924 and imatinib, as indicated. (C) Immunoblotting analysis of phospho-AKT and phospho-mTOR in whole cell extracts, and nuclear and cytosolic FOXO1 and FOXO3a protein level in BV173 and SUPB15 cells treated overnight with various concentrations of MLN4924, as indicated. Beta-actin and lamin A/C blotting was used to control for loading.

# Figure S4

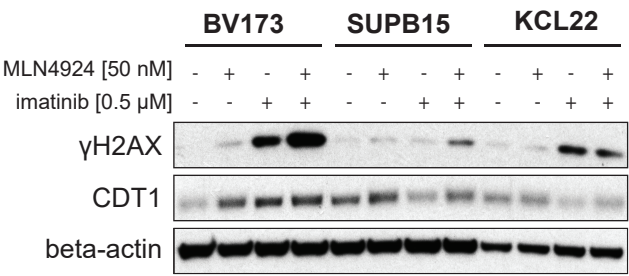

**Figure S4. MLN4924 treatment induces accumulation of replication licensing factor CDT1 and induces phosphorylation of H2AX, which is exacerbated by imatinib co-treatment.** Immunoblot analysis of BV173, SUPB15 and KCL22 Ph+ leukemia cells cells treated overnight with 50 nM MLN4924 + 0.5  $\mu$ M imatinib, as indicated. Beta-actin was used to control for loading.



**Figure S5**

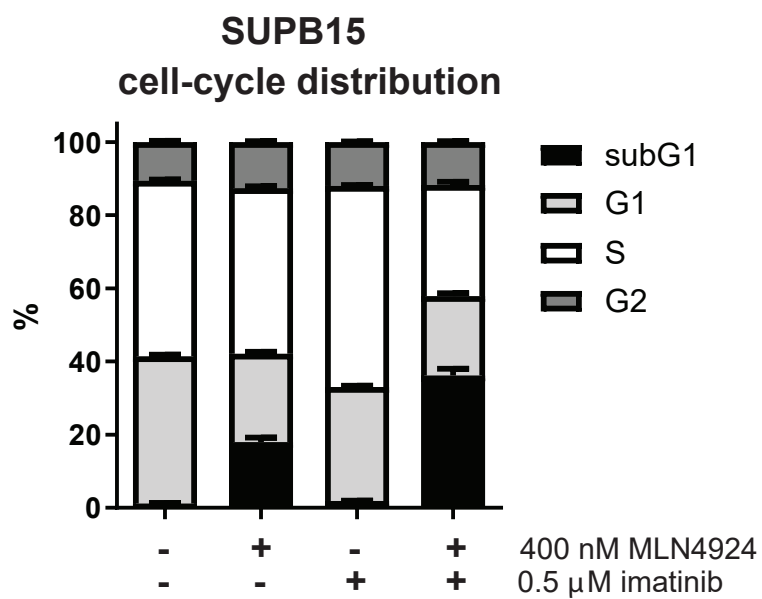

**Figure S5. Cell-cycle distribution of SUPB15 cells upon MLN4924 and imatinib treatment.**

Bargraphs depicting BrdU-incorporation and cell cycle analysis of SUPB15 cells treated overnight with 400 nM MLN4924, 0.5  $\mu$ M imatinib or the combination of both, as indicated. Graph depicts percentage of cells in the different cell-cycle stages.

Figure S6

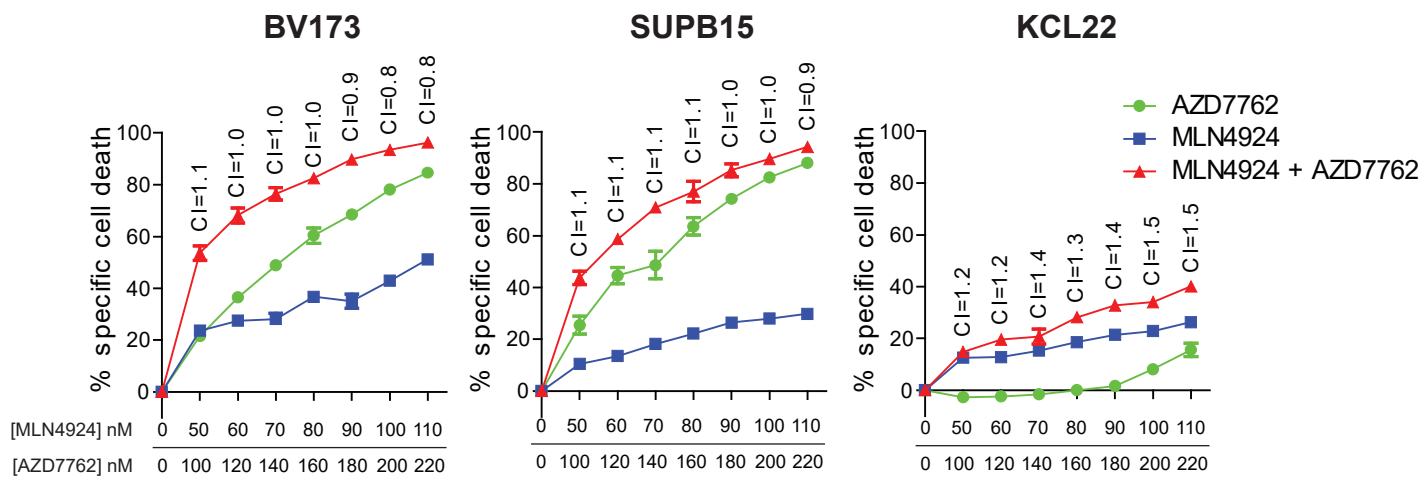

**Figure S6. Additive effects of MLN4924 and the CHK1-inhibitor AZD7762 in Ph+ leukemia cells.** BV173, SUPB15 and KCL22 cells were exposed for three days to various concentrations of MLN4924 and AZD7762, as indicated. Means  $\pm$ SEM of percent specific cell death are depicted, experiments were performed in triplicate. CI values of relevant data point are shown.

## Figure S7

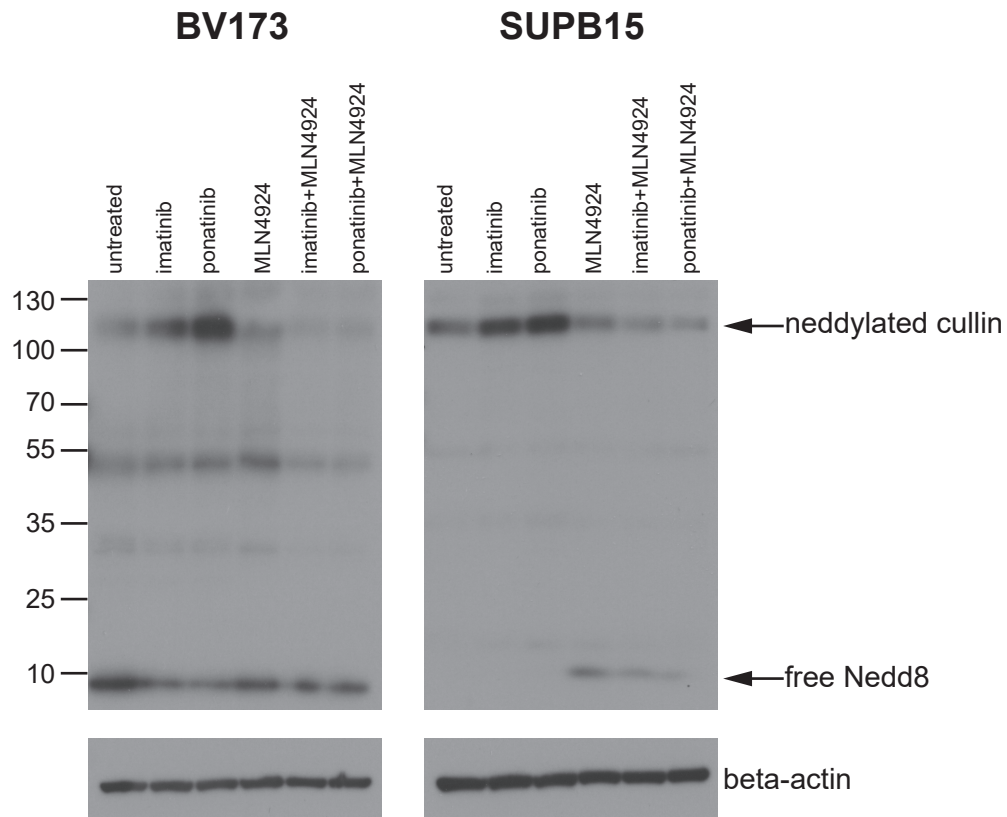

**Figure S7. ABL TKIs imatinib and ponatinib alter global protein neddylation and potentiate NAE1 inhibition by MLN4924 in Ph+ leukemia cells.**

Immunoblot analysis of free Nedd8 and protein-conjugated Nedd8 in BV173 and SUPB15 Ph+ leukemia cells treated overnight with 2.5  $\mu$ M imatinib, 20 nM ponatinib, 100 nM MLN4924, the combination of imatinib + MLN4924, or ponatinib + MLN4924, as indicated. Numbers reflect molecular size in kDa. Bands representing neddylated cullin and free Nedd8 are indicated. Beta-actin blotting was used to control for loading.

**Figure S8**

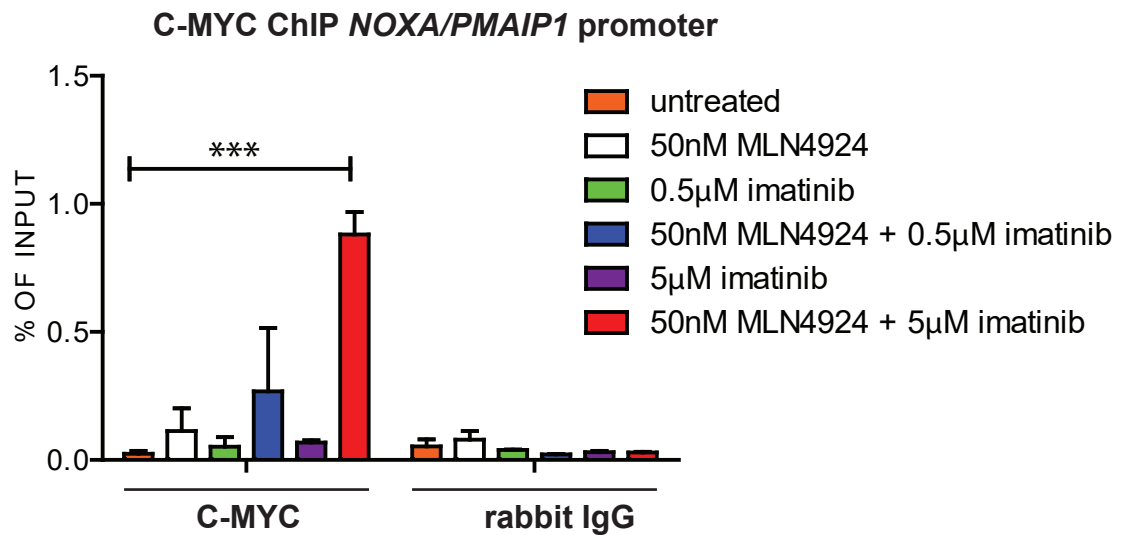

**Figure S8. MLN4924 and imatinib treatment results in binding of C-MYC to the *NOXA* promoter.** Chromatin immunoprecipitation (ChIP) analysis of BV173 treated overnight with MLN4924 and imatinib as indicated. Binding of C-MYC and control rabbit IgG to the *NOXA/PMAIP1* promoter as determined by ChIP, shown as percent of input. A representative example of 2 independent experiments is shown, PCR quantification was performed in triplicate, means  $\pm$  SEM are shown (\*\* $p < 0.001$ , One-way ANOVA).
